# Supplementary material for: Quality assurance and control on hydrological data off westernSardinia (2000–2004), western Mediterranean
Source: Copernicus journal article supplement (doi:10.5194/essd-2020-17), 2020-02-04
Supplement: Supplementary file [file essd-2020-17-AC1-supplement.pdf]

**Reviewer's 1 comments on the following manuscript:**

**essd-2020-17, Submitted on 24 Jan 2020**

**Quality assurance and control on hydrological data off western Sardinia (2000–2004), western Mediterranean.**

**by Alberto Ribotti, Roberto Sorgente, and Mireno Borghini**

**Reviewer:** Dr. Alain LEFEBVRE, Ifremer, France ([Alain.Lefebvre@ifremer.fr](mailto:Alain.Lefebvre@ifremer.fr))

Dear Dr. LEFEBVRE,

we thank the you for having accepted the review and improved our manuscript with your comments and suggestions.

We agree with the points raised and we have answered all your comments.

Below, reviewer's comments are given in normal font and our responses in red.

Cruises have been defined to “give a useful contribution on the knowledge of the local upper, intermediate and deep circulation and its interaction with the general Mediterranean circulation”. Considering these objectives, what is surprising is that proposed variables do not include systematic current measurements but main classical physical and biological variables. Authors should explain why such current measurements were not implemented systematically. Indeed, in section 3. Other acquisition, we understand that current meters were deployed only during a limited number of cruises.

Thanks for having raised this point. LADCP measurements at CNR started in those years and ADCPs were not available during all cruises. After their acquisition, usually current data were stored but never published. A great job is ongoing in these months to rescue and reprocess all raw data and build a complete high quality database.

The following sentence has been added in the 6th paragraph (p.7 lines 211-213): "The rescue and reprocessing of hydrodynamic data is ongoing in order to reorganize them in a quality controlled database. The same will be for the biological parameters. A first dataset of nutrients data from more recent cruises (late 2014 - 2017) is available at <https://doi.org/10.5194/essd-2019-136>."

A link with the Essential Oceanographic Variables (EOV) and Essential Biodiversity Variables (EBV) as recommended for a well-suited monitoring programme should have been interesting to develop.

We fully agree with the reviewer and this was an error

The materials and methods are described in sufficient details. The authors provided main characteristics of each sensor and also the associated range, accuracy, resolution and response time. The quality of the data is assured as the authors follow (well documented) good practises at sea and in lab. All these information are also included in the two associated SEANOE archives. We can however regret the absence of a validation protocol for fluorescence data.

Fluorescence sensor was calibrated following the instructions described by Sea-Bird Electronics Inc. in its APPLICATION NOTE NO. 9, downloadable at <https://www.seabird.com/application-notes>,

where SEASOFT Coefficients for the Sea Tech Fluorometer are calculated. However no validation of the data has been applied after the cruises.

Anyway the sentence was rewritten as follows, adding a new reference (see p.7 new lines 199-202): "Chl-*a* was calibrated following the instructions given by SBE (2008a) where the SEASOFT™ coefficients for the Sea Tech fluorometer are calculated. No validation of the data has been applied after the cruises. It is reported as Relative Fluorescence Unit (R.F.U.) in the datasets. Also pressure sensors were not calibrated as usually stable but, if problems occurred, it was sent to SBE Inc. in USA for its calibration."

Added the following reference in bibliography "SBE: AN-9: Calculating SEASOFT Coefficients for Sea Tech Fluorometer and WET Labs Flash Lamp Fluorometer (FLF). 1 p, 2008a"

I'm not sure that figures 2, 3 and 5 are very helpful.

We thought that figures could improve the description of the instruments or labs on the text but, as both reviewers noted a redundancy in description plus figures, we have deleted them. Then the numbers of the figures have been updated in the text.

To conclude, I propose that the manuscript should be **accepted subject to minor revisions**.

**Minor corrections and comments directly in the text as comments in the attached PDF file:**

New pages and lines are mentioned if they changed after correction as *new p.x and/or new line y*.

p.2, line 43: put *in-situ* in *italic* in the whole text. Here it disappeared due to the rewriting of the whole sentence.

p.2, line 44, now lines 43-44: whole sentence rewritten accordingly "Due to such an oceanographic importance, since the '50s French or Italian unsystematic cruises have been organized in the area whose data are available in the PANGAEA (<https://www.pangaea.de>) and SEANOE repositories (Dumas et al., 2018)."

p.2, line 46, now lines 45-46: acronym defined in the text. Sentence rewritten as "the Science and Technology Organisation - Centre for Maritime Research and Experimentation of the North Atlantic Treatment Organization (NATO STO-CMRE), based in La Spezia,"

p.2, line 53: sentence deleted as it did not improve the information on instruments or data then previously

p.3, line 69, now line 68: changed accordingly

p. 3, line 71, now line 70: I would leave the past "was" as this vessel does not exist anymore

p.3, line 83: changed in the whole text for all parameters

p. 5, line 130, now line 126: changed accordingly

p.5, line 130, now lines 126-132: added what requested but rewriting the sentences as follows "For Chlorophyll-*a* (Chl-*a*), CDOM and DOC all the water samples were filtered on 0.42µm Whatmann GF/F glass microfiber filters for Chl-*a* and 0.22µm membrane filter (Sartorius, Minisart, SM 16534 K)

for DOC and CDOM; this to remove the particulate fraction immediately after collection. Then filters were frozen at +4°C to be analyzed at labs following standard procedures described by Lazzara et al. (1990) for Chl-*a*, and by Vignudelli et al. (2004) and Santinelli et al. (2008) for CDOM and DOC. For nutrients, during the first three medgoos cruises water samples were partially analyzed on-board by a Systea  $\mu$ CHEM Auto-analyzer, while remaining samples frozen at -20°C following Strickland and Parsons (1972). In the following cruises all water samples were frozen and then analyzed once back."

p.5, line 135, now line 132: checked in the whole text and reformatted following the Copernicus Word Template

p. 6, line 168, now line 164: corrected

p.6, line 173, now line 168: corrected

p.6 line 175, now 170: corrected

p.7 line 180, now p.6 line 175: corrected

p.7 line 181, now p.6 line 176: corrected

p.7 line 201, now p.6 line 196: rewritten as "If the shift was random, Soc and Voffset for dissolved oxygen, slope and offset for conductivity/temperature were recalculated and then the data corrected following the procedures described in the application notes number 64-2 (SBE, 2008b, 2012) and 31 (SBE, 2016), respectively." Added the following references in bibliography " SBE: AN-64-2: AN64-2: SBE 43 Dissolved Oxygen Sensor Calibration and Data Corrections. 5 pp, 2012" and "SBE: AN-31: Computing Temperature & Conductivity Slope & Offset Correction Coefficients from Lab Calibration & Salinity Bottle Samples. 8 pp, 2016"

p.12 line 355: figure deleted

p.12 lines 356-357: figure deleted

p.12 line 359: figure deleted

p. 14 ex-figure 4, now figure 2: changed decimal separator accordingly

p. 15 ex-figure 6, now figure 3: changed decimal separator and depth format accordingly

p. 16 table 1: changed decimal data format according to ISO 8601
