# Supplementary material for: Quality assurance and control on hydrological data off westernSardinia (2000–2004), western Mediterranean
Source: Copernicus journal article supplement (doi:10.5194/essd-2020-17), 2020-02-04
Supplement: Supplementary file [file essd-2020-17-AC2-supplement.pdf]

**Reviewer's 2 comments on the following manuscript:**

**essd-2020-17, Submitted on 10 March 2020**

**Quality assurance and control on hydrological data off western Sardinia (2000–2004), western Mediterranean.**

**by Alberto Ribotti, Roberto Sorgente, and Mireno Borghini**

**Reviewer:** Dr. Sarantis Sofianos (Referee)

Dear Dr. SOFIANOS,

we thank the you for having accepted the review and improved our manuscript with your comments and suggestions.

We agree with the points raised and we have answered all your comments.

Below, reviewer's comments are given in normal font and our responses in red.

The manuscript "Quality assurance and control on hydrological data off western Sardinia(2000 - 2004), western Mediterranean" by Ribotti et al. presents an open access dataset (and its quality control methods) that includes data acquired during seven oceanographic cruises off the coast of western Sardinia, Western Mediterranean. The main aim of the cruises and the publication of the dataset is to give to the scientific community a contribution to the local circulation and interaction with the general Mediterranean circulation. The description of instrumentation and quality assurance and control methods of the dataset is clear and informative (although the pictures of specific instruments seem redundant).

We thought that figures could improve the description of the instruments or labs on the text but, as both reviewers noted a redundancy in description plus figures, we have deleted them. Then the numbers of the figures have been updated in the text.

The information is also included in the SEANOE archives. Based on the aim of the cruises, the absence of hydrodynamic (ADCP) data makes the dataset "weaker" and less informative. The reason for not including this data should be better explained by the authors.

Thanks for having raised this point. As explained to referee 1 too, LADCP measurements at CNR started in those years and ADCPs were not available during all cruises. After their acquisition, usually current data were stored but never used. A great job to rescue, reprocess all raw data and build a complete high quality database is ongoing in these months.

The following sentence has been added in the 6th paragraph (p.7 lines 211): "The rescue and reprocessing of hydrodynamic data is ongoing in order to reorganize them in a quality controlled database."

p.1 line 15: corrected

p.1 line 28: corrected

p.2 line 35: corrected

p.2 line 44: apart from the sentence was completely rewritten

p. 3 lines 83-84, now lines 82-83: units corrected

p.4 line 96, now line 95: corrected

p.6 line 156, now line 151: corrected
